# Supplementary material for: Functional characterization of MANNOSE-BINDING LECTIN 1, a G-type lectin gene family member, in response to fungal pathogens of strawberry
Source: PubMed Central journal article supplement (PMC9786840; doi:10.1093/jxb/erac396), 2022-10-11
Supplement: erac396_suppl_supplementary_material.pdf [file erac396_suppl_supplementary_material.pdf]

JXB supplementary data

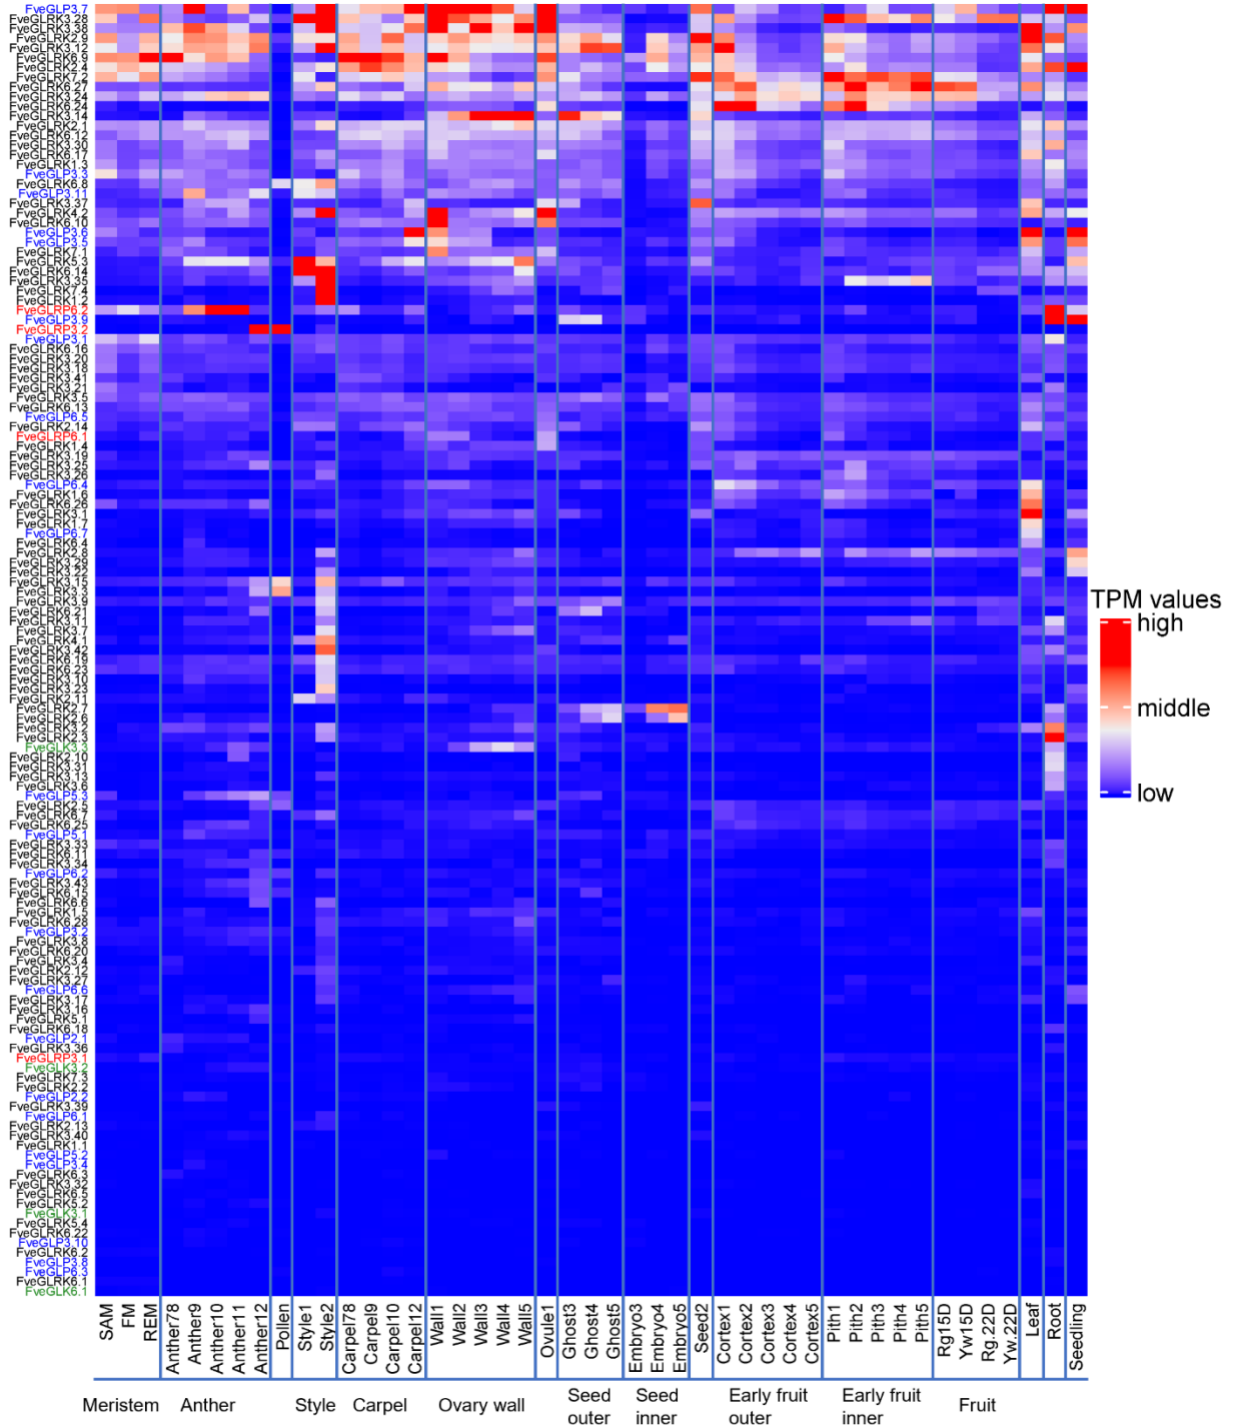

**Fig. S1.** Expression profiles of G-type lectin genes in *Fragaria vesca* tissues and developmental stages. The different types of G-lectin genes are reported on the left in different colors: G-type lectin receptor kinases (G-LecRKs) in black, G-type lectin proteins (G-LecPs) in blue, G-type

lectin receptor proteins (G-LecRPs) in red, and G-type lectin kinases (G-LecKs) in green. The expression levels are indicated by TPM (transcript per million reads) and the TPM value for each gene is scaled before constructing the heatmap. SAM: shoot apical meristem; FM: flower meristem; REM: receptacle meristem; Anther7/8/9/10/11/12: stage 7-8/9/10/11/12 anther; Style1/2: stage1/2 style; Carpel7/8/9/10/12: stage 7-8/9/10/12 carpel; Wall1/2/3/4/5: stage 1/2/3/4/5 ovary wall; Ovule1: stage 1 ovule; Ghost3/4/5: stage 3/4/5 endosperm and seed coat; Embryo3/4/5: stage 3/4/5 embryo; Cortex1/2/3/4/5: outer part of the early fruit at stage 1/2/3/4/5; Pith1/2/3/4/5: inner part of the early fruit at stage 1/2/3/4/5; Rg.15D: green fruit stage of Rügen; Yw.15D: green fruit stage of Yellow Wonder 5AF7; Rg.22D: white fruit stage of Rügen; Yw.22D: white fruit stage of Yellow Wonder 5AF7.

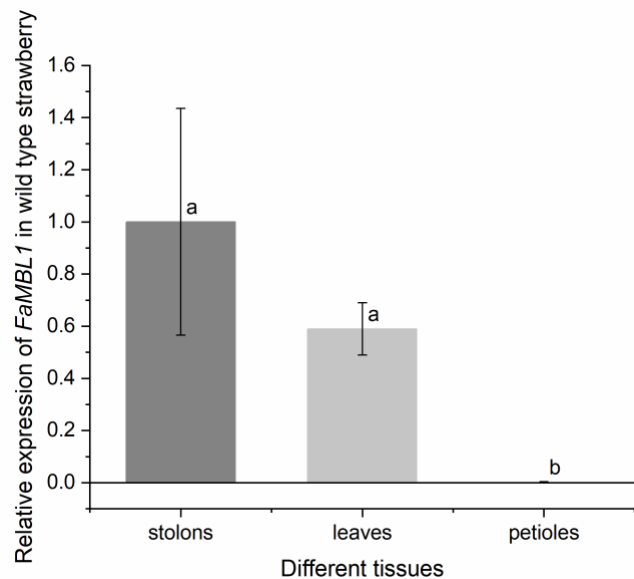

**Fig. S2.** Relative expression of *FaMBL1* in different tissues of wild type strawberry (*Fragaria × ananassa*). All values were normalized to the expression level of the *elongation factor 1a* housekeeping gene. The expression of *FaMBL1* gene in stolons was regarded as 1. Each value is an average of three biological replicates with its standard deviation. Means with the same letter are not significantly different at  $P < 0.05$ .

**Table S1.** List of primer name and primer sequence with their description

| <b>Primer description</b> | <b>Primer names</b> | <b>Primer sequences from 5' to 3'</b> |
|---------------------------|---------------------|---------------------------------------|
| RT-PCR <i>FaMBL1</i> gene | FaMBL1_CUR fw       | AAACCAACACGGCCAATAAG                  |
|                           | FaMBL1_CUR rev      | GTCTGTCGGGTAGTCGAAGC                  |
| RT-PCR reference gene     | FaEF1a fw           | TGGATTTGAGGGTGACAACATGA               |
|                           | FaEF1a rev          | GTATACATCCTGAAGTGGTAGTCGGAGG          |
| <i>FaPAL1</i>             | FaPAL1 fw           | TGGACTACGGCTTCAAAGGT                  |
|                           | FaPAL1 rev          | GACATCTTGGTTGTGTTGCTC                 |
| <i>FaPGIP</i>             | FaPGIP fw           | ATCTCACAGGTCCCATCCAG                  |
|                           | FaPGIP rev          | GCTGAGGAAGTCAGGGACTG                  |
| <i>FaAOS1</i>             | FaAOS1 fw           | AGGTTAAAGAAGGCGAGGTGTT                |
|                           | FaAOS1 rev          | GAGGACCGTTAGACCAAAGCA                 |
| <i>FaChi2-1</i>           | FaChi2-1 fw         | AAGCCCTCTTGTCACGATGT                  |
|                           | FaChi2-1 rev        | TCGAGTCCACCGTTGATGAT                  |
| <i>FaChi2-2</i>           | FaChi2-2 fw         | ATGTG GGC GT GGACA AGATA              |
|                           | FaChi2-2 rev        | AACAG TCCAA GTTGT CCCCA               |
| <i>FaACO</i>              | FaACO fw            | AGGTTAAAGAAGGCGAGGTGTT                |
|                           | FaACO rev           | GAGGACCGTTAGACCAAAGCA                 |
| <i>FaTLP1b</i>            | FaTLP1b fw          | GTGCATCACTTCTTCCAAGT                  |
|                           | FaTLP1b rev         | CAAACCTGCTAGCAGTGAAG                  |

**Table S2.** Proposed nomenclature for G-type lectin genes in *Fragaria vesca*

| Classification                | Gene ID      | New Name              | Classification                | Gene ID      | New Name    |
|-------------------------------|--------------|-----------------------|-------------------------------|--------------|-------------|
| G-type lectin receptor kinase | FvH4_1g03780 | FveGLRK1.1            | G-type lectin receptor kinase | FvH4_5g31680 | FveGLRK5.2  |
|                               | FvH4_1g04840 | FveGLRK1.2            |                               | FvH4_5g31930 | FveGLRK5.3  |
|                               | FvH4_1g16211 | FveGLRK1.3            |                               | FvH4_5g32570 | FveGLRK5.4  |
|                               | FvH4_1g23370 | FveGLRK1.4            |                               | FvH4_6g00257 | FveGLRK6.1  |
|                               | FvH4_1g23380 | FveGLRK1.5            |                               | FvH4_6g00270 | FveGLRK6.2  |
|                               | FvH4_1g23390 | FveGLRK1.6            |                               | FvH4_6g07960 | FveGLRK6.3  |
|                               | FvH4_1g23400 | FveGLRK1.7            |                               | FvH4_6g12870 | FveGLRK6.4  |
|                               | FvH4_2g12390 | FveGLRK2.1            |                               | FvH4_6g12880 | FveGLRK6.5  |
|                               | FvH4_2g14250 | FveGLRK2.2            |                               | FvH4_6g12890 | FveGLRK6.6  |
|                               | FvH4_2g26490 | FveGLRK2.3            |                               | FvH4_6g12930 | FveGLRK6.7  |
|                               | FvH4_2g29050 | FveGLRK2.4            |                               | FvH4_6g20800 | FveGLRK6.8  |
|                               | FvH4_2g29070 | FveGLRK2.5            |                               | FvH4_6g26380 | FveGLRK6.9  |
|                               | FvH4_2g29542 | FveGLRK2.6            |                               | FvH4_6g26420 | FveGLRK6.10 |
|                               | FvH4_2g29543 | FveGLRK2.7            |                               | FvH4_6g26450 | FveGLRK6.11 |
|                               | FvH4_2g29544 | FveGLRK2.8            |                               | FvH4_6g29821 | FveGLRK6.12 |
|                               | FvH4_2g29545 | FveGLRK2.9            |                               | FvH4_6g29840 | FveGLRK6.13 |
|                               | FvH4_2g29560 | FveGLRK2.10           |                               | FvH4_6g31370 | FveGLRK6.14 |
|                               | FvH4_2g33830 | FveGLRK2.11           |                               | FvH4_6g44063 | FveGLRK6.15 |
|                               | FvH4_2g33840 | FveGLRK2.12           |                               | FvH4_6g44064 | FveGLRK6.16 |
|                               | FvH4_2g33850 | FveGLRK2.13           |                               | FvH4_6g44100 | FveGLRK6.17 |
|                               | FvH4_2g33870 | FveGLRK2.14           |                               | FvH4_6g44106 | FveGLRK6.18 |
|                               | FvH4_3g03230 | FveGLRK3.1            |                               | FvH4_6g44107 | FveGLRK6.19 |
|                               | FvH4_3g03231 | FveGLRK3.2            |                               | FvH4_6g44108 | FveGLRK6.20 |
|                               | FvH4_3g03240 | FveGLRK3.3            |                               | FvH4_6g44109 | FveGLRK6.21 |
|                               | FvH4_3g03242 | FveGLRK3.4            |                               | FvH4_6g44140 | FveGLRK6.22 |
|                               | FvH4_3g03243 | FveGLRK3.5            |                               | FvH4_6g44190 | FveGLRK6.23 |
|                               | FvH4_3g03301 | FveGLRK3.6            |                               | FvH4_6g44243 | FveGLRK6.24 |
|                               | FvH4_3g03310 | FveGLRK3.7            |                               | FvH4_6g44244 | FveGLRK6.25 |
|                               | FvH4_3g03320 | FveGLRK3.8            |                               | FvH4_6g44245 | FveGLRK6.26 |
|                               | FvH4_3g03350 | FveGLRK3.9            |                               | FvH4_6g44310 | FveGLRK6.27 |
|                               | FvH4_3g03370 | FveGLRK3.10           |                               | FvH4_6g51830 | FveGLRK6.28 |
|                               | FvH4_3g03390 | FveGLRK3.11           |                               | FvH4_7g00200 | FveGLRK7.1  |
|                               | FvH4_3g03410 | FveGLRK3.12           | FvH4_7g14760                  | FveGLRK7.2   |             |
| FvH4_3g03420                  | FveGLRK3.13  | FvH4_7g19680          | FveGLRK7.3                    |              |             |
| FvH4_3g03430                  | FveGLRK3.14  | FvH4_7g30670          | FveGLRK7.4                    |              |             |
| FvH4_3g03431                  | FveGLRK3.15  | G-type lectin protein | FvH4_2g05942                  | FveGLP2.1    |             |
| FvH4_3g03432                  | FveGLRK3.16  |                       | FvH4_2g24770                  | FveGLP2.2    |             |

|  |              |             |                                   |              |            |
|--|--------------|-------------|-----------------------------------|--------------|------------|
|  | FvH4_3g03433 | FveGLRK3.17 |                                   | FvH4_3g03322 | FveGLP3.1  |
|  | FvH4_3g03450 | FveGLRK3.18 |                                   | FvH4_3g03340 | FveGLP3.2  |
|  | FvH4_3g03451 | FveGLRK3.19 |                                   | FvH4_3g03435 | FveGLP3.3  |
|  | FvH4_3g03461 | FveGLRK3.20 |                                   | FvH4_3g15150 | FveGLP3.4  |
|  | FvH4_3g03481 | FveGLRK3.21 |                                   | FvH4_3g18370 | FveGLP3.5  |
|  | FvH4_3g03482 | FveGLRK3.22 |                                   | FvH4_3g18371 | FveGLP3.6  |
|  | FvH4_3g03501 | FveGLRK3.23 |                                   | FvH4_3g18380 | FveGLP3.7  |
|  | FvH4_3g03502 | FveGLRK3.24 |                                   | FvH4_3g18382 | FveGLP3.8  |
|  | FvH4_3g03520 | FveGLRK3.25 |                                   | FvH4_3g18383 | FveGLP3.9  |
|  | FvH4_3g03521 | FveGLRK3.26 |                                   | FvH4_3g18410 | FveGLP3.10 |
|  | FvH4_3g03560 | FveGLRK3.27 |                                   | FvH4_3g21271 | FveGLP3.11 |
|  | FvH4_3g03590 | FveGLRK3.28 |                                   | FvH4_5g04270 | FveGLP5.1  |
|  | FvH4_3g06140 | FveGLRK3.29 |                                   | FvH4_5g04310 | FveGLP5.2  |
|  | FvH4_3g15080 | FveGLRK3.30 |                                   | FvH4_5g31690 | FveGLP5.3  |
|  | FvH4_3g15120 | FveGLRK3.31 |                                   | FvH4_6g00300 | FveGLP6.1  |
|  | FvH4_3g15130 | FveGLRK3.32 |                                   | FvH4_6g12332 | FveGLP6.2  |
|  | FvH4_3g15690 | FveGLRK3.33 |                                   | FvH4_6g12920 | FveGLP6.3  |
|  | FvH4_3g15930 | FveGLRK3.34 |                                   | FvH4_6g44062 | FveGLP6.4  |
|  | FvH4_3g21270 | FveGLRK3.35 |                                   | FvH4_6g44101 | FveGLP6.5  |
|  | FvH4_3g21310 | FveGLRK3.36 |                                   | FvH4_6g44242 | FveGLP6.6  |
|  | FvH4_3g21320 | FveGLRK3.37 |                                   | FvH4_6g44260 | FveGLP6.7  |
|  | FvH4_3g21400 | FveGLRK3.38 |                                   | FvH4_3g03241 | FveGLK3.1  |
|  | FvH4_3g43401 | FveGLRK3.39 | G-type lectin<br>kinase           | FvH4_3g03300 | FveGLK3.2  |
|  | FvH4_3g43402 | FveGLRK3.40 |                                   | FvH4_3g15980 | FveGLK3.3  |
|  | FvH4_3g43403 | FveGLRK3.41 |                                   | FvH4_6g44240 | FveGLK6.1  |
|  | FvH4_3g43440 | FveGLRK3.42 |                                   |              |            |
|  | FvH4_3g43710 | FveGLRK3.43 | G-type lectin<br>receptor protein | FvH4_3g03581 | FveGLRP3.1 |
|  | FvH4_4g02170 | FveGLRK4.1  |                                   | FvH4_3g15090 | FveGLRP3.2 |
|  | FvH4_4g33230 | FveGLRK4.2  |                                   | FvH4_6g10470 | FveGLRP6.1 |
|  | FvH4_5g04350 | FveGLRK5.1  |                                   | FvH4_6g17930 | FveGLRP6.2 |
|  |              |             |                                   |              |            |

**Table S3.** MIQE checklist for authors, reviewers, and editors.

| ITEM TO CHECK                                                                                     | IMPORTANCE | CHECKLIST |
|---------------------------------------------------------------------------------------------------|------------|-----------|
| <b>EXPERIMENTAL DESIGN</b>                                                                        |            |           |
| Definition of experimental and control groups                                                     | E          | Yes       |
| Number within each group                                                                          | E          | N/A       |
| Assay carried out by core lab or investigator's lab?                                              | D          | Yes       |
| Acknowledgement of authors' contributions                                                         | D          | Yes       |
| <b>SAMPLE</b>                                                                                     |            |           |
| Description                                                                                       | E          | Yes       |
| Volume/mass of sample processed                                                                   | D          | Yes       |
| Microdissection or macrodissection                                                                | E          | N/A       |
| Processing procedure                                                                              | E          | Yes       |
| If frozen - how and how quickly?                                                                  | E          | Yes       |
| If fixed - with what, how quickly?                                                                | E          | N/A       |
| Sample storage conditions and duration (especially for FFPE samples)                              | E          | Yes       |
| <b>NUCLEIC ACID EXTRACTION</b>                                                                    |            |           |
| Procedure and/or instrumentation                                                                  | E          | Yes       |
| Name of kit and details of any modifications                                                      | E          | Yes       |
| Source of additional reagents used                                                                | D          | N/A       |
| Details of DNase or RNase treatment                                                               | E          | Yes       |
| Contamination assessment (DNA or RNA)                                                             | E          | N/A       |
| Nucleic acid quantification                                                                       | E          | Yes       |
| Instrument and method                                                                             | E          | Yes       |
| Purity (A260/A280)                                                                                | D          | N/A       |
| Yield                                                                                             | D          | N/A       |
| RNA integrity method/instrument                                                                   | E          | Yes       |
| RIN/RQI or Cq of 3' and 5' transcripts                                                            | E          | N/A       |
| Electrophoresis traces                                                                            | D          | Yes       |
| Inhibition testing (Cq dilutions, spike or other)                                                 | E          | N/A       |
| <b>REVERSE TRANSCRIPTION</b>                                                                      |            |           |
| Complete reaction conditions                                                                      | E          | Yes       |
| Amount of RNA and reaction volume                                                                 | E          | Yes       |
| Priming oligonucleotide (if using GSP) and concentration                                          | E          | N/A       |
| Reverse transcriptase and concentration                                                           | E          | Yes       |
| Temperature and time                                                                              | E          | Yes       |
| Manufacturer of reagents and catalogue numbers                                                    | D          | N/A       |
| Cqs with and without RT                                                                           | D*         | N/A       |
| Storage conditions of cDNA                                                                        | D          | Yes       |
| <b>qPCR TARGET INFORMATION</b>                                                                    |            |           |
| If multiplex, efficiency and LOD of each assay.                                                   | E          | N/A       |
| Sequence accession number                                                                         | E          | Yes       |
| Location of amplicon                                                                              | D          | N/A       |
| Amplicon length                                                                                   | E          | Yes       |
| <i>In silico</i> specificity screen (BLAST, etc) Pseudogenes, retropseudogenes or other homologs? | E          | N/A       |
| Sequence alignment                                                                                | D          | N/A       |
| Secondary structure analysis of amplicon                                                          | D          | Yes       |
| Location of each primer by exon or intron (if applicable)                                         | E          | N/A       |
| What splice variants are targeted?                                                                | E          | N/A       |
| <b>qPCR OLIGONUCLEOTIDES</b>                                                                      |            |           |
| Primer sequences                                                                                  | E          | Yes       |

|                                                           |     |     |
|-----------------------------------------------------------|-----|-----|
| RTPrimerDB Identification Number                          | D   | N/A |
| Probe sequences                                           | D** | N/A |
| Location and identity of any modifications                | E   | N/A |
| Manufacturer of oligonucleotides                          | D   | N/A |
| Purification method                                       | D   | N/A |
| <b>qPCR PROTOCOL</b>                                      |     |     |
| Complete reaction conditions                              | E   | Yes |
| Reaction volume and amount of cDNA/DNA                    | E   | Yes |
| Primer, (probe), Mg <sup>++</sup> and dNTP concentrations | E   | Yes |
| Polymerase identity and concentration                     | E   | Yes |
| Buffer/kit identity and manufacturer                      | E   | Yes |
| Exact chemical constitution of the buffer                 | D   | N/A |
| Additives (SYBR Green I, DMSO, etc.)                      | E   | Yes |
| Manufacturer of plates/tubes and catalog number           | D   | N/A |
| Complete thermocycling parameters                         | E   | Yes |
| Reaction setup (manual/robotic)                           | D   | N/A |
| Manufacturer of qPCR instrument                           | E   | Yes |
| <b>qPCR VALIDATION</b>                                    |     |     |
| Evidence of optimisation (from gradients)                 | D   | N/A |
| Specificity (gel, sequence, melt, or digest)              | E   | Yes |
| For SYBR Green I, C <sub>q</sub> of the NTC               | E   | Yes |
| Standard curves with slope and y-intercept                | E   | Yes |
| PCR efficiency calculated from slope                      | E   | Yes |
| Confidence interval for PCR efficiency or standard error  | D   | N/A |
| r <sup>2</sup> of standard curve                          | E   | Yes |
| Linear dynamic range                                      | E   | Yes |
| C <sub>q</sub> variation at lower limit                   | E   | N/A |
| Confidence intervals throughout range                     | D   | N/A |
| Evidence for limit of detection                           | E   | N/A |
| If multiplex, efficiency and LOD of each assay.           | E   | Yes |
| <b>DATA ANALYSIS</b>                                      |     |     |
| qPCR analysis program (source, version)                   | E   | Yes |
| C <sub>q</sub> method determination                       | E   | Yes |
| Outlier identification and disposition                    | E   | Yes |
| Results of NTCs                                           | E   | Yes |
| Justification of number and choice of reference genes     | E   | Yes |
| Description of normalisation method                       | E   | Yes |
| Number and concordance of biological replicates           | D   | Yes |
| Number and stage (RT or qPCR) of technical replicates     | E   | Yes |
| Repeatability (intra-assay variation)                     | E   | N/A |
| Reproducibility (inter-assay variation, %CV)              | D   | N/A |
| Power analysis                                            | D   | N/A |
| Statistical methods for result significance               | E   | Yes |
| Software (source, version)                                | E   | Yes |
| C <sub>q</sub> or raw data submission using RDML          | D   | N/A |
